# Supplementary material for: New insight into the growth of monolayer MoS2 flakes using an indigenously developed CVD setup: a study on shape evolution and spectroscopy
Source: Royal Society of Chemistry journal article supplement (doi:10.1039/d1qm00063b), 2021-01-01
Supplement: d1qm00063b1.pdf [file d1qm00063b1.pdf]

Electronic Supplementary Material (ESI) for Materials Chemistry Frontiers.  
This journal is © the Partner Organisations 2021

## Supplementary Material

New insight into growth of monolayer MoS<sub>2</sub> flakes by indigenously developed CVD setup: A study on shape evolution and spectroscopy

Girija Shankar Papanai<sup>a,b</sup>, Samanta Pal<sup>c</sup>, Prabir Pal<sup>b,c</sup>, Brajesh S. Yadav<sup>d</sup>, Preeti Garg<sup>d</sup>, Sarika Gupta<sup>e</sup>, S. G. Ansari<sup>f</sup>, and Bipin Kumar Gupta<sup>a,b,\*</sup>

<sup>a</sup>*Photonic Materials Metrology Sub Division, Advanced Materials and Device Metrology Division, CSIR-National Physical Laboratory, Dr. K. S. Krishnan Marg, New Delhi 110012, India*

<sup>b</sup>*Academy of Scientific and Innovative Research (AcSIR), Ghaziabad 201002, India*

<sup>c</sup>*CSIR - Central Glass and Ceramic Research Institute, 196, Raja S. C. Mullick Road, Kolkata 700032, India*

<sup>d</sup>*Solid State Physics Laboratory, Timarpur, Delhi 110054, India*

<sup>e</sup>*Molecular Sciences Lab, National Institute of Immunology, Aruna Asaf Ali Marg, New Delhi 110067, India*

<sup>f</sup>*Centre for Interdisciplinary Research in Basic Sciences, Jamia Millia Islamia, Jamia Nagar, New Delhi-110025, India*

\*E-mail: bipinbhu@yahoo.com

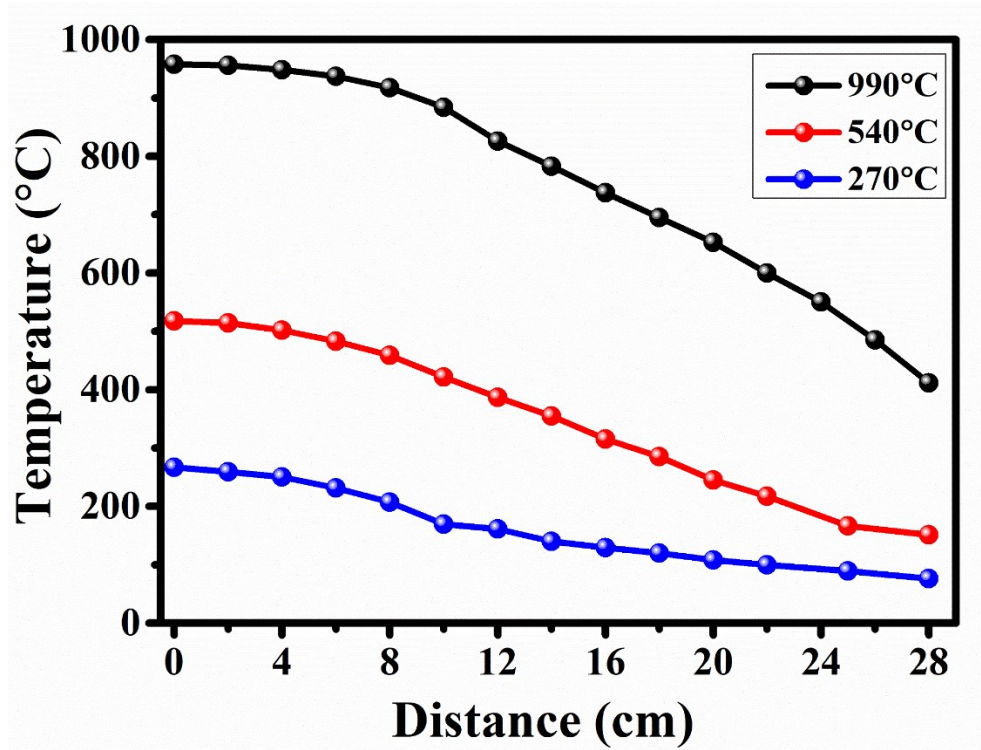

**Figure S1.** The temperature profile of quartz tuSSbe towards the upstream direction from center location of the zone at three different temperatures (990 °C, 540 °C, and 270 °C). The profiles show the actual temperature at different locations across the tube and the legend displays the set temperature of the single zone furnace.

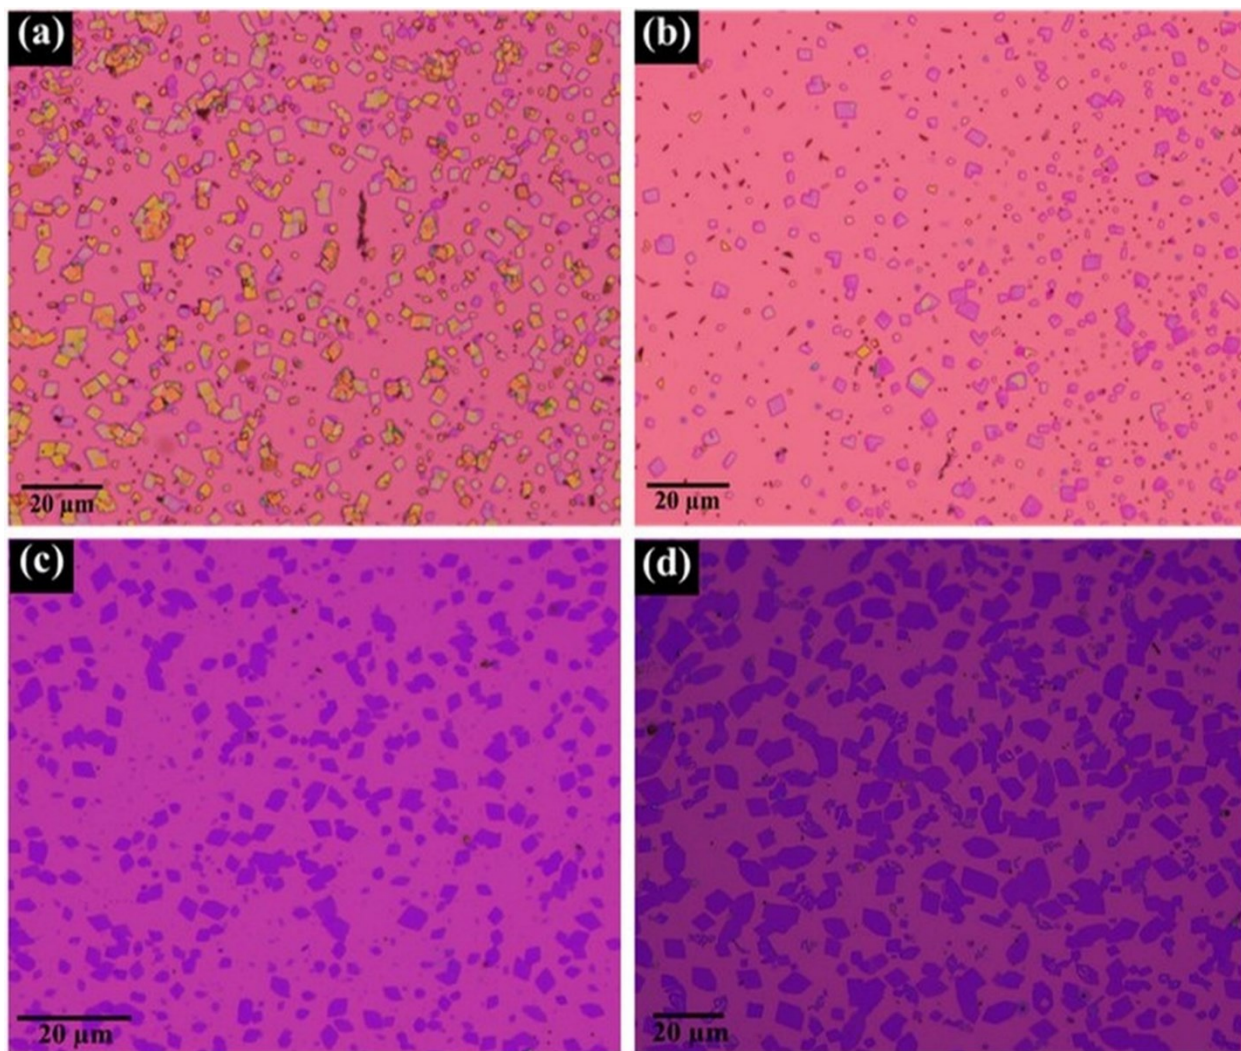

**Figure S2.** The optical images of CVD grown MoO<sub>2</sub> flakes over Si substrate having SiO<sub>2</sub> thickness of 300 nm (Substrate-I), close to MoO<sub>3</sub> powder. (a) The optical image at the growth temperature of 700°C and ~1:8.6 weight ratio of MoO<sub>3</sub> and S precursors. (b) The optical image at the growth temperature of 725°C and weight ratio of ~ 1:7.1. (c,d) The optical images at the growth temperature of 750°C and weight ratio of ~ 1:3.

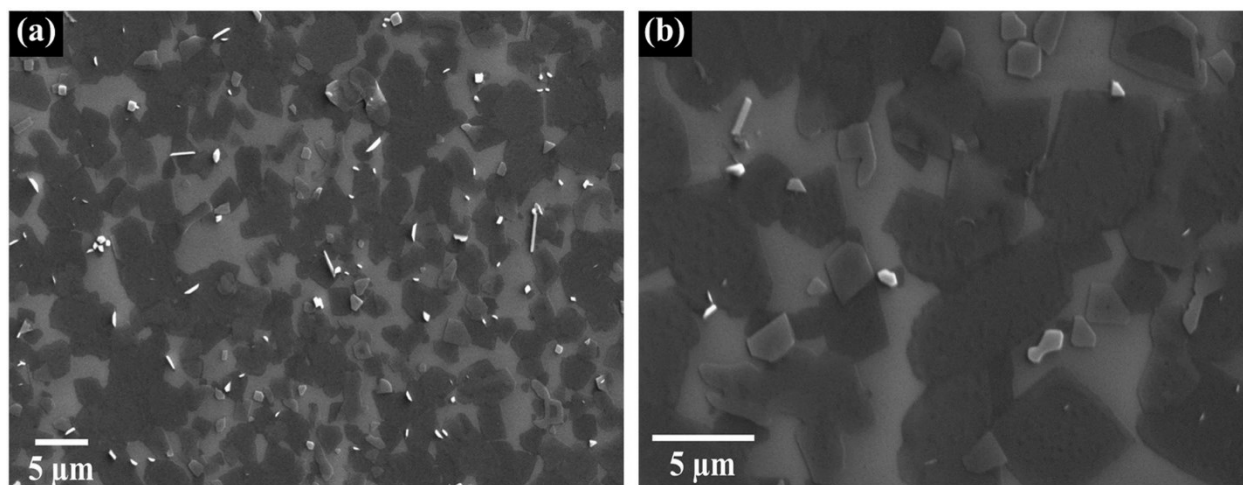

**Figure S3.** (a,b) The SEM images of different MoO<sub>2</sub> flakes on Substrate-I at the growth temperature of 750°C and weight ratio of ~ 1:3.

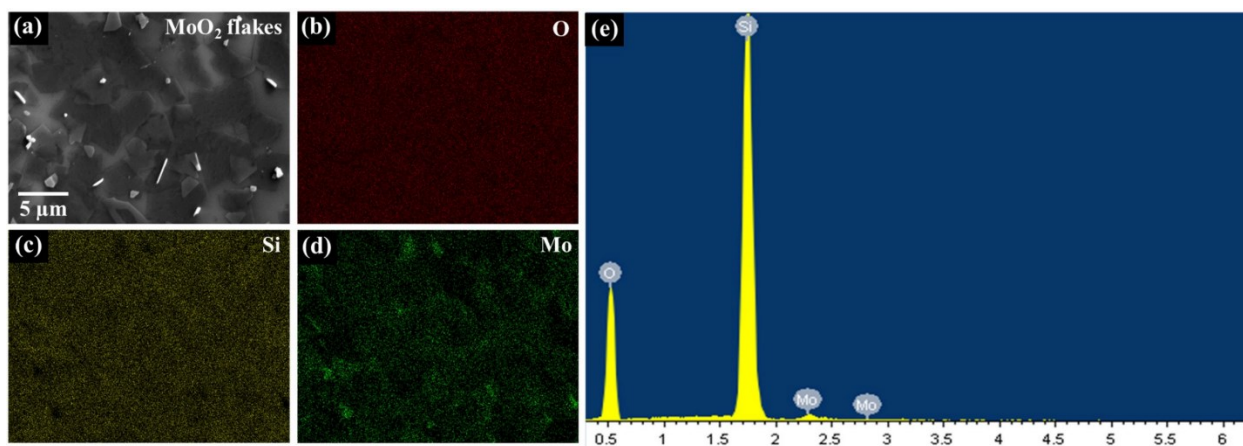

**Figure S4.** (a-d) shows the EDX elemental mapping images of O, Si, and Mo in MoO<sub>2</sub> flakes. (e) Elemental analyses of the MoO<sub>2</sub> flakes over Si/SiO<sub>2</sub> substrate (Substrate-I).

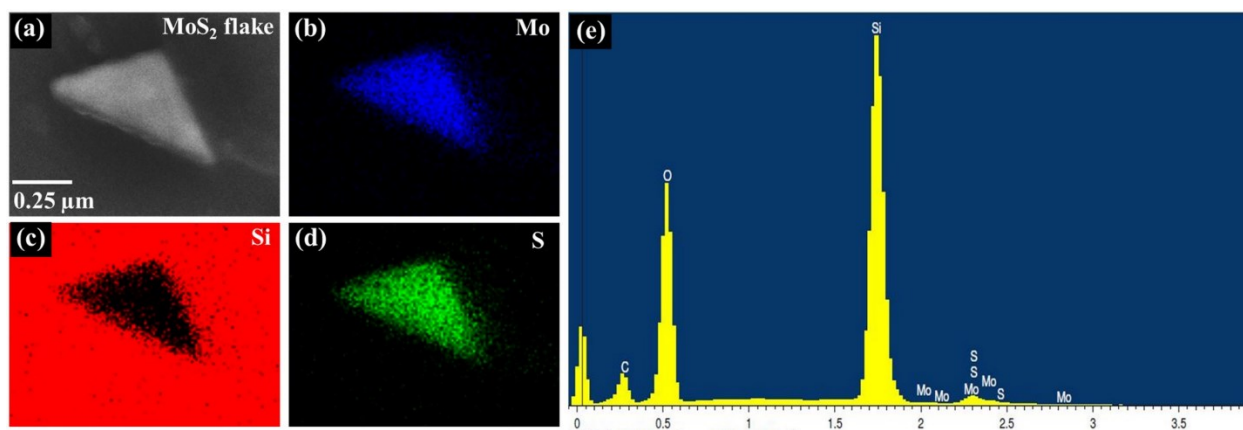

**Figure S5.** (a-d) shows the EDX elemental mapping images of Mo, Si, and S in MoS<sub>2</sub> flakes. (e) Elemental analyses of the MoS<sub>2</sub> flakes over Si/SiO<sub>2</sub> substrate (Substrate-II).

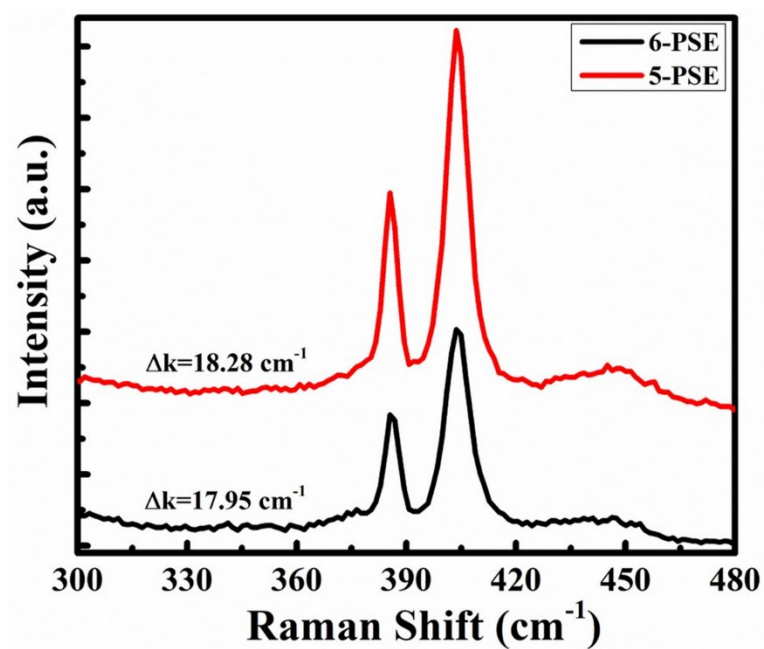

**Figure S6.** Raman spectra are captured on the edge of five-point star and six-point star MoS<sub>2</sub> flakes deposited over Si/SiO<sub>2</sub> substrate.

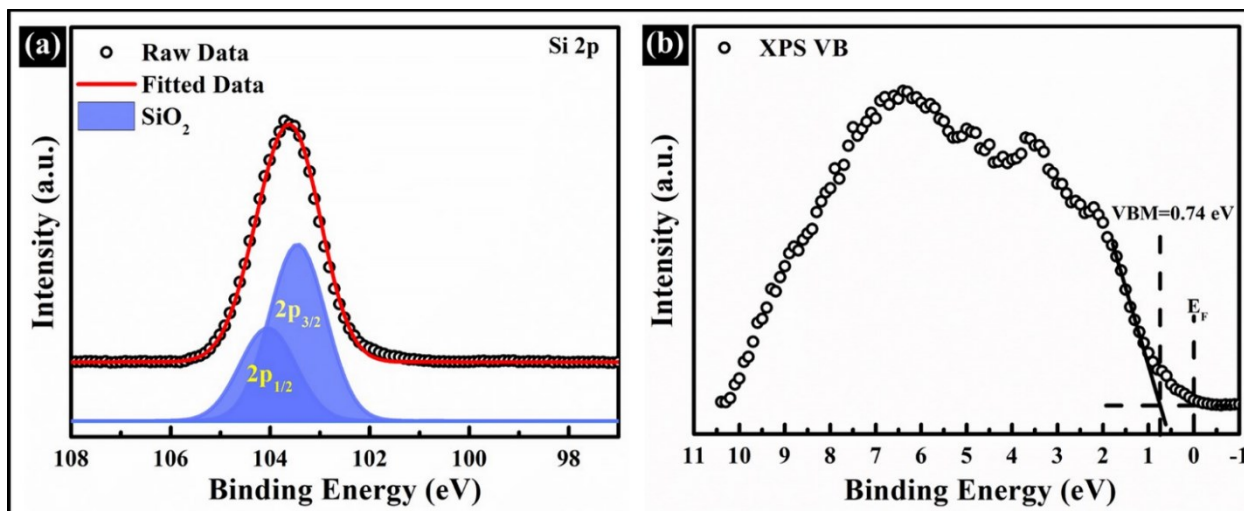

**Figure S7.** (a) High-resolution XPS spectra of Si 2p. (b) XPS-VB spectra are recorded at room temperature, and the valence band maxima position is located at  $0.74 \pm 0.05$  eV below the Fermi level.

**Table S1.** Fitting parameters of the PL spectra in various shapes of MoS<sub>2</sub> flakes deposited on Si/SiO<sub>2</sub> substrate.

| Shapes (MoS <sub>2</sub> flakes) | A <sup>-</sup> trion (eV) | A <sup>0</sup> exciton (eV) | B exciton (eV) | VBS (meV) |
|----------------------------------|---------------------------|-----------------------------|----------------|-----------|
| Triangle (normal)                | –                         | 1.82663                     | 1.97937        | 152.74    |
| Triangle (sharp)                 | 1.76775                   | 1.82098                     | 1.96045        | 139.47    |
| Truncated Triangle               | 1.77075                   | 1.81766                     | 1.94566        | 128.00    |
| Three point star                 | –                         | 1.81385                     | 1.96559        | 151.74    |
| Four point star                  | 1.76973                   | 1.81293                     | 1.94385        | 130.92    |
| Five point star                  | 1.77303                   | 1.83342                     | 1.95728        | 123.86    |
| Six point star                   | 1.77941                   | 1.82049                     | 1.94592        | 125.43    |
| Tilt boundary                    | 1.76906                   | 1.81521                     | 1.94673        | 131.52    |
| Mirror boundary                  | 1.76975                   | 1.82162                     | 1.94456        | 122.94    |
